# Supplementary material for: Low intensity, continuous wave photodoping of ZnO quantum dots – photon energy and particle size effects
Source: Royal Society of Chemistry journal article supplement (doi:10.1039/c6cp06829d), 2017-01-01
Supplement: c6cp06829d1.pdf [file c6cp06829d1.pdf]

## Supporting Information

# Low intensity, continuous wave photodoping of ZnO quantum dots. Photon energy and particle size effects

Matías E. Aguirre,<sup>a</sup> S. Municoy,<sup>b</sup> M. A. Grela<sup>a\*</sup> and A. J. Colussi.<sup>c\*</sup>

<sup>a</sup> Instituto de Investigaciones Físicas de Mar del Plata (IFIMAR)-Departamento de Química, Facultad de Ciencias Exactas y Naturales, Universidad Nacional de Mar del Plata-CONICET, Funes 3350, (7600) Mar del Plata, Prov. de Buenos Aires, Argentina.

<sup>b</sup> Departamento de Micro y Nanotecnología, GAIANN -Centro Atómico Constituyentes. Comisión Nacional de Energía Atómica, Av. Gral Paz 1499 - (1650) - San Martín - Prov. de Buenos Aires, Argentina.

<sup>c</sup> Linde Center for Global Environmental Science, California Institute of Technology, Pasadena, California 91125, United States.

# Supporting Information

|     | <b>Description</b>                                                              | <b>Page</b> |
|-----|---------------------------------------------------------------------------------|-------------|
| S-1 | <b>Capping action of ethylene glycol on ZnO quantum dots</b>                    | 3           |
| S-2 | <b>Size distribution</b>                                                        | 4           |
| S-3 | <b>Spectrophotometric determination of MV<sup>2+</sup> photoreduction rates</b> | 5           |
| S-4 | <b>Effective mass model</b>                                                     | 6           |

### S-1 Capping action of ethylene glycol on ZnO quantum dots

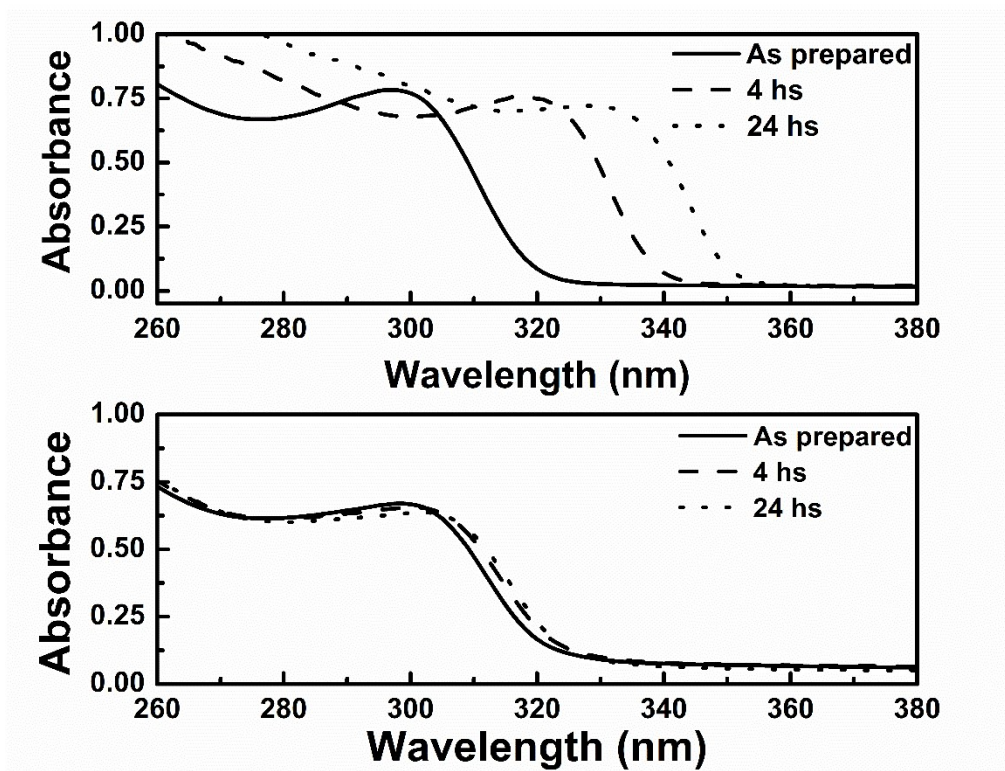

Figure S1: Comparison between the room temperature evolution of the UV absorption spectra of ZnO QDs synthesized at  $T_R = 0\text{ }^\circ\text{C}$ , after a 1:20 dilution in ethanol (top) or ethylene glycol (bottom).

## S-2 Size distribution

The mean size of the particles and its distribution was obtained using the procedure developed by Pesika.<sup>1</sup>

For dilute concentrations, the absorbance,  $A$ , of a sol at any wavelength is related to the total volume of particles with radius greater or equal to the size corresponding to the absorption onset. Thus, for spherical particles

$$A(r) \propto \int_r^{\infty} \frac{4}{3}\pi r^3 n_p(r) dr \quad (\text{E1})$$

where  $n_p(r)$  is the particle size distribution. It follows from eq. (1), that the particle size distribution is related to the local slope of the absorption spectrum:

$$n_p(r) \propto -\frac{dA/dr}{\frac{4}{3}\pi r^3} = n_p^*(r) \quad (\text{E2})$$

Using the above expression, we obtained the size distribution for each sample. For all the samples the distributions could be fitted to a Gaussian function, as shown in Figure S2 for sample B.

| Sample | $T_R$ (°C) | $\langle r \rangle$ (nm) | $\sigma$ (nm) |
|--------|------------|--------------------------|---------------|
| A      | 0          | 1.70                     | 0.06          |
| B      | 25         | 2.10                     | 0.11          |
| C      | 65         | 2.65                     | 0.16          |

Table S2: Mean particle size and dispersion obtained from the fit of the distribution to a Gaussian function

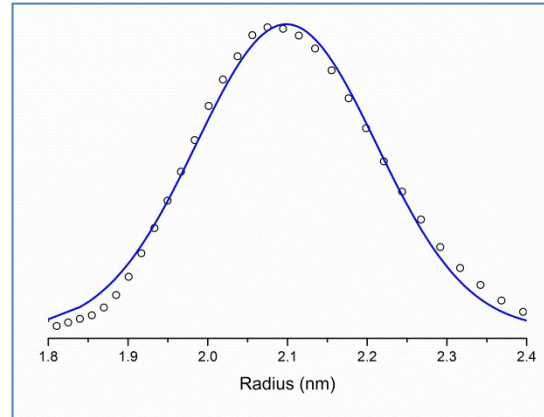

Figure S2: Particle size distribution obtained from the absorbance spectra of the ZnO nanoparticles synthesized at 25 °C (sample B) after ethylene glycol capping.

### S-3 Spectrophotometric determination of $MV^{2+}$ photoreduction rates

Typical spectrophotometric determination of  $MV^{2+}$  photoreduction rates.

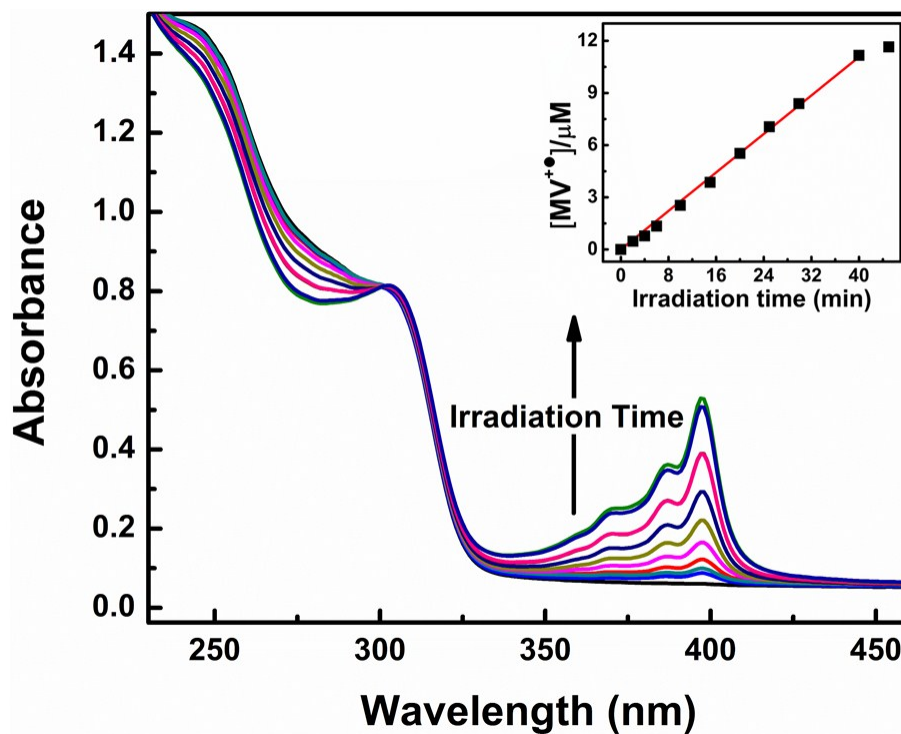

Figure S3: Time evolution of the UV-Vis absorption spectra obtained during the  $MV^{2+}$  anaerobic photoreduction in the presence of EG-capped ZnO QDs (Sample A). Irradiation wavelength  $303 \pm 5$  nm. Inset  $[MV^{+•}]$  as a function of irradiation time. The photoreduction rate can be readily obtained from the slope.

#### S-4 Effective mass model

Neglecting the polarization terms, the use of standard models under the Brus effective mass approximation<sup>2,3</sup> makes possible to correlate the position of the conduction,  $E^{BC}(r)$ , and valence band,  $E^{BV}(r)$ , under confinement according to:<sup>4</sup>

$$E^{BC}(r) \cong E^{BC}(\infty) + \frac{\hbar^2}{8r^2 m_e^*} - 0.9 \frac{e^2}{4\pi\epsilon_0\epsilon_r r} \quad (E3)$$

$$E^{BV}(r) \cong E^{BV}(\infty) + \frac{\hbar^2}{8r^2 m_h^*} - 0.9 \frac{e^2}{4\pi\epsilon_0\epsilon_r r} \quad (E4)$$

$$E_g(R) = E^{BC}(R) - E^{BV}(R) = E_g(\infty) + \frac{\hbar^2}{8r^2} \left( \frac{1}{m_e^*} + \frac{1}{m_h^*} \right) - 1.8 \frac{e^2}{4\pi\epsilon_0\epsilon_r r} \quad (E5)$$

In the above equation  $m_e^*$ ,  $m_h^*$  are the effective mass of the electron ( $0.28m_e$ ), and the hole ( $0.59m_e$ ), respectively,  $m_e$  the electron mass,  $r$  the radius of the particle,  $\epsilon$  the dielectric constant of ZnO, and  $\epsilon_0$  the permittivity of free space.<sup>5,6</sup>

## References

---

- <sup>1</sup> Pesika, N. S.; Stebe, K. J.; Searson, P. C. Relationship between Absorbance Spectra and Particle Size Distributions for Quantum-Sized Nanocrystals. *J. Phys. Chem. B* **2003**, *107*, 10412-10415.
- <sup>2</sup> Brus, L., Electronic Wave Functions in Semiconductor Clusters: Experiment and Theory. *J. Phys. Chem.* **1986**, *90*, 2555-2560.
- <sup>3</sup> Jacobsson, T. J.; Edvinsson, T., Absorption and Fluorescence Spectroscopy of Growing ZnO Quantum Dots: Size and Band Gap Correlation and Evidence of Mobile Trap States. *Inorg. Chem.* **2011**, *50*, 9578-9586.
- <sup>4</sup> Zhang, L.; Yin, L.; Wang, C.; Jun, N.; Qi, Y.; Xiang, D. Origin of Visible Photoluminescence of ZnO Quantum Dots: Defect-Dependent and Size-Dependent. *J. Phys. Chem. C* **2010**, *114*, 9651-9658.
- <sup>5</sup> Jacobsson, T. J.; Edvinsson, T. Photoelectrochemical Determination of the Absolute Band Edge Positions as a Function of Particle Size for ZnO Quantum Dots. *J. Phys. Chem. C* **2012**, *116*, 15692-15701.
- <sup>6</sup> Stroyuk, O. L.; Dzhagan, V. M.; Shvalagin, V. V.; Kuchmiy, S. Y., Size-Dependent Optical Properties of Colloidal ZnO Nanoparticles Charged by Photoexcitation. *J. Phys. Chem. C* **2010**, *114*, 220-225.
